# Supplementary material for: In situ polymer flocculation and growth in Taylor–Couette flows
Source: Royal Society of Chemistry journal article supplement (doi:10.1039/c8sm01694a), 2018-01-01
Supplement: c8sm01694a1.pdf [file c8sm01694a1.pdf]

## Supplemental Information

### In situ polymer flocculation and growth in Taylor-Couette flows

*Athena Metaxas,<sup>1</sup> Nikolas Wilkinson,<sup>1</sup> Ellie Raethke,<sup>1</sup> and Cari S. Dutcher<sup>2</sup>*

<sup>1</sup> Department of Chemical Engineering and Materials Science, University of Minnesota – Twin Cities, 421 Washington Ave SE, Minneapolis, MN 55455, USA

<sup>2</sup> Department of Mechanical Engineering, University of Minnesota - Twin Cities, 111 Church Street SE, Minneapolis, MN 55455, USA

#### Table of Contents

|                |   |
|----------------|---|
| Figure S1..... | 2 |
| Figure S2..... | 3 |
| Figure S3..... | 4 |
| Figure S4..... | 5 |
| Figure S5..... | 6 |

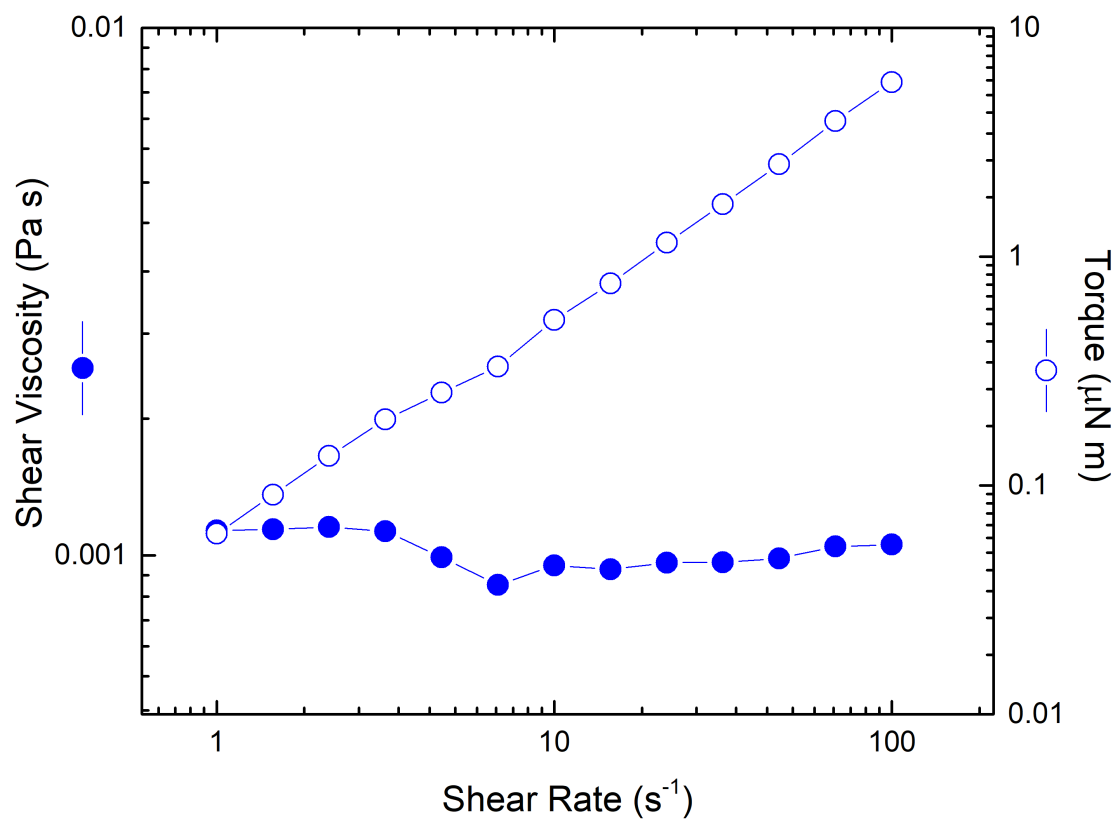

*Figure S1:* Steady shear viscosity and torque response traces of 30 mg/L bentonite in distilled water from shear rates of  $1 \text{ s}^{-1}$  to  $100 \text{ s}^{-1}$ . The temperature was kept constant at  $25^\circ\text{C}$ . The experiment was performed using a cup and bob geometry to mimic the TC cell geometry.

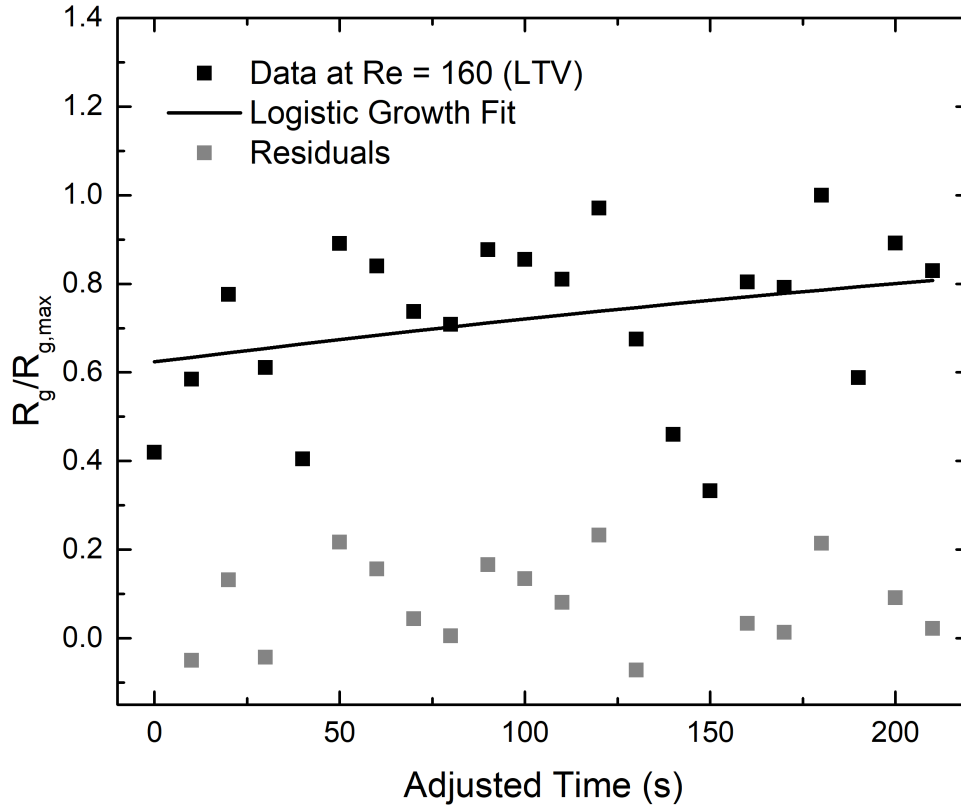

*Figure S1:* Logistic growth fit to floc size data at inner cylinder speed of 0.04 Hz ( $Re = 160$ , LTV) over time. The black data points represent the  $R_g$  data points collected during the experiment normalized by the maximum value of  $R_g$  in the fitting range. The black line indicates the fit. The gray data points are the residuals of the fit, which is the data point calculated by the logistic growth model subtracted from the original data at the corresponding time point.

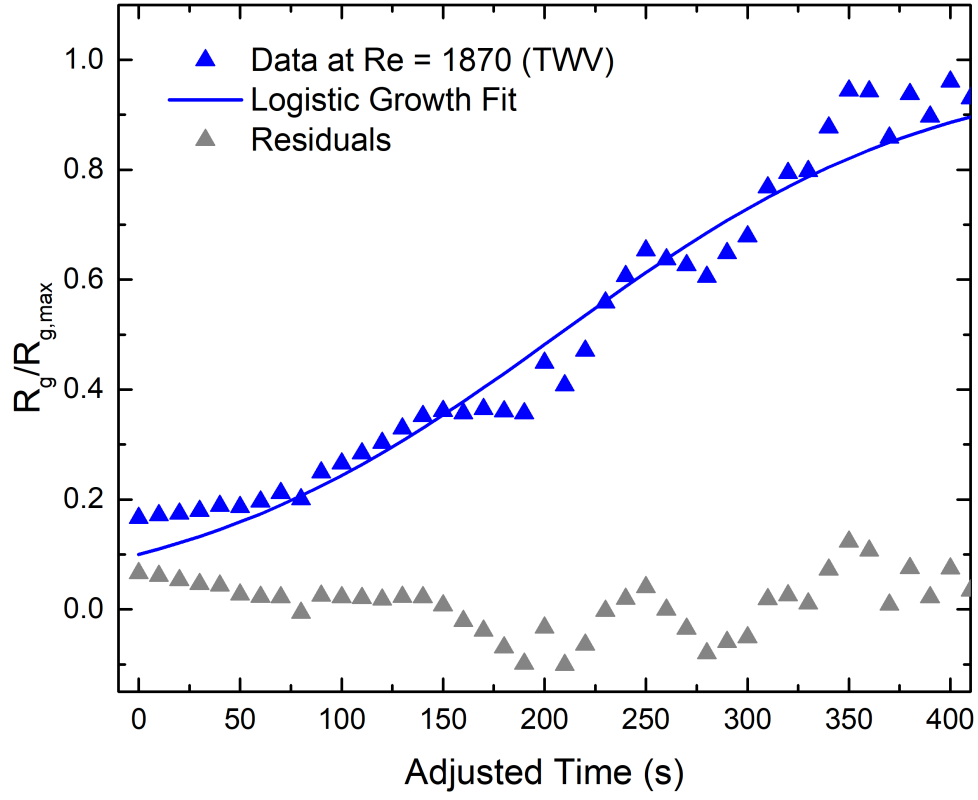

*Figure S2:* Logistic growth fit to flocculation data at inner cylinder speed of 0.50 Hz ( $Re = 1870$ , TWV) over time. The blue data points represent the  $R_g$  data points collected during the experiment normalized by the maximum value of  $R_g$  in the fitting range. The blue line indicates the fit. The gray data points are the residuals of the fit, which is the data point calculated by the logistic growth model subtracted from the original data at the corresponding time point.

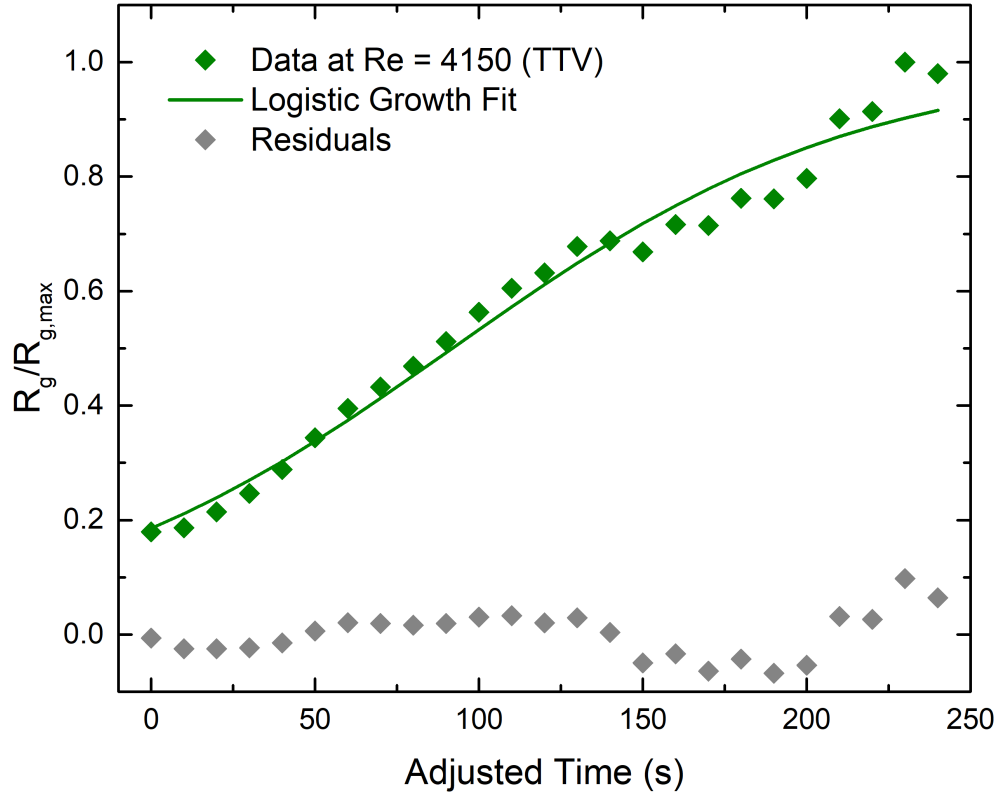

*Figure S3:* Logistic growth fit to flocculation data at inner cylinder speed of 1.10 Hz ( $Re = 4150$ , TTV) over time. The green data points represent the  $R_g$  data points collected during the experiment normalized by the maximum value of  $R_g$  in the fitting range. The green line indicates the fit. The gray data points are the residuals of the fit, which is the data point calculated by the logistic growth model subtracted from the original data at the corresponding time point.

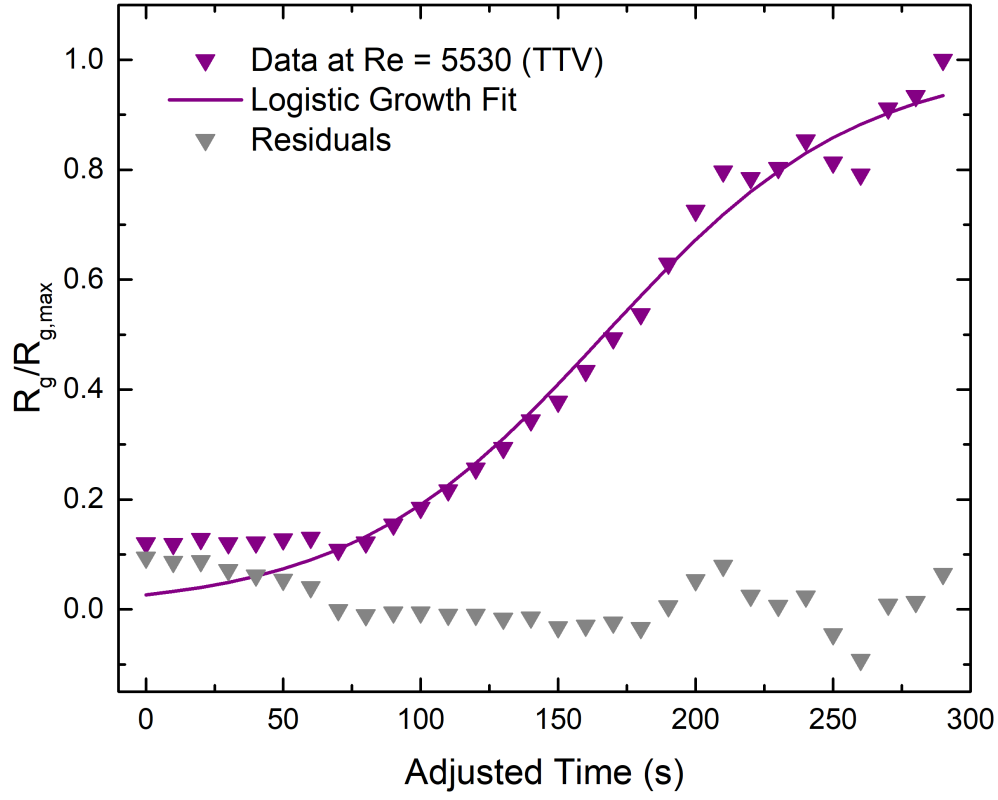

*Figure S4:* Logistic growth fit to flocculation data at inner cylinder speed of 1.10 Hz ( $Re = 5530$ , TTV) over time. The purple data points represent the  $R_g$  data points collected during the experiment normalized by the maximum value of  $R_g$  in the fitting range. The purple line indicates the fit. The gray data points are the residuals of the fit, which is the data point calculated by the logistic growth model subtracted from the original data at the corresponding time point.
